# Supplementary material for: Systematic exploration of N, C configurational effects on the ORR performance of Fe–N doped graphene catalysts based on DFT calculations
Source: Royal Society of Chemistry journal article supplement (doi:10.1039/c9ra02822f), 2019-01-01
Supplement: c9ra02822f1.pdf [file c9ra02822f1.pdf]

## **Supporting Information**

**Systematic exploration of N, C configurational effects on the ORR performance  
of Fe-N doped graphene catalysts based on DFT calculations**

**Guangqi Zhu<sup>1</sup>, Fan Liu<sup>1</sup>, Dongzi Yang<sup>1</sup>, Dong Jia<sup>1</sup>, Fengmin Jin<sup>1\*</sup>, Wei Wang<sup>1\*</sup>**

<sup>1</sup>School of Chemical Engineering and Technology, Tianjin University, Tianjin 300072,  
China

Table S1. Adsorption energy of oxygen (eV) on Fe-N-C-gra and O-O and Fe-O bond lengths(Å).

| Defect        | $E_{ad}$ |         | $d_{O-O}$ |         | $d_{Fe-O}$ |                | $\Delta$ |
|---------------|----------|---------|-----------|---------|------------|----------------|----------|
|               | end on   | side on | end on    | side on | end on     | side on        |          |
| Fe-3C         | --       | -1.82   | --        | 1.413   | --         | 1.849<br>1.851 | 0.002    |
| Fe-1N         | --       | -2.28   | --        | 1.424   | --         | 1.841<br>1.872 | 0.031    |
| Fe-2N         | --       | -2.53   | --        | 1.440   | --         | 1.912<br>1.794 | 0.118    |
| Fe-3N         | -2.08    | -2.90   | 1.354     | 1.430   | 1.732      | 1.838<br>1.880 | 0.042    |
| Fe-4C         | -1.32    | -1.86   | 1.303     | 1.408   | 1.701      | 1.848<br>1.852 | 0.004    |
| Fe-1N-3C      | -1.57    | -2.17   | 1.302     | 1.413   | 1.691      | 1.835<br>1.871 | 0.036    |
| Fe-2N-2C-oppo | -1.91    | -1.98   | 1.318     | 1.362   | 1.710      | 1.896<br>1.898 | 0.002    |
| Fe-2N-2C-pen  | -1.30    | -1.24   | 1.299     | 1.429   | 1.690      | 1.842<br>1.864 | 0.022    |
| Fe-2N-2C-hex  | -1.48    | -1.31   | 1.301     | 1.416   | 1.690      | 1.817<br>1.918 | 0.101    |
| Fe-3N-1C      | -1.32    | -1.30   | 1.312     | 1.373   | 1.730      | 1.884<br>1.905 | 0.021    |
| Fe-4N         | -1.33    | -1.10   | 1.315     | 1.386   | 1.770      | 1.900<br>1.897 | 0.003    |

Note:  $\Delta$  is the difference between the bond lengths of Fe-O<sub>1</sub> and Fe-O<sub>2</sub> (Å).

-- no stable chemical adsorption configuration

Table S2. Adsorption free energy of \*OOH, \*OH, and \*O on Fe-N-C-gra (eV).

| Defect        | $\Delta G_{*OOH}$ | $\Delta G_{*OH}$ | $\Delta G_{*O}$ |
|---------------|-------------------|------------------|-----------------|
| Fe-2N-2C-oppo | 2.76              | -0.30            | 0.50            |
| Fe-2N-2C-pen  | 3.65              | 0.63             | 1.20            |
| Fe-2N-2C-hex  | 3.63              | 0.57             | 1.19            |

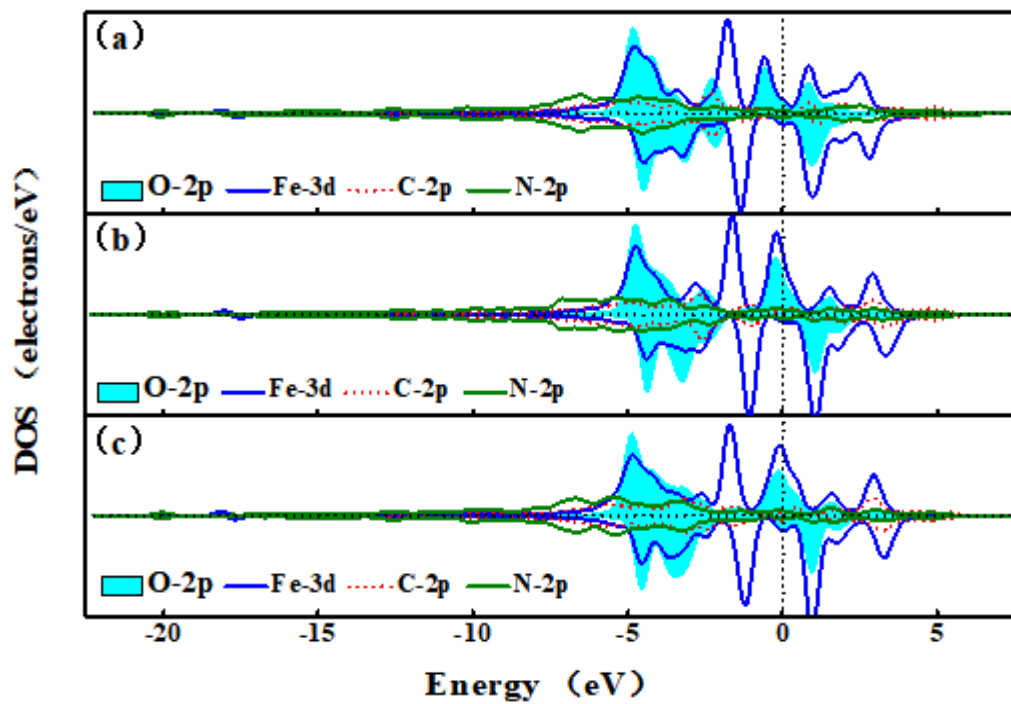

Figure S1. The DOS of the adsorbed O atoms on the Fe-2N-2C-gra in double vacancy (a) O on Fe-2N-2C-oppo site, (b) O on Fe-2N-2C-pen site, (c) O on Fe-2N-2C-hex site.

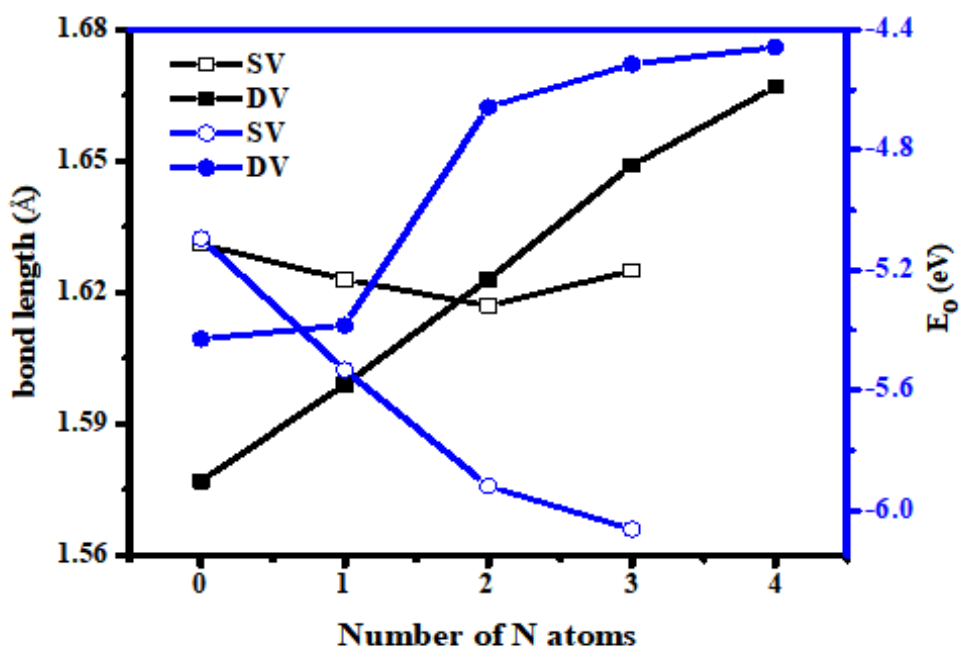

Figure S2. Bond length and  $E_0$  versus number of N atoms in single (SV) or double (DV) vacancy Fe-N doped structures

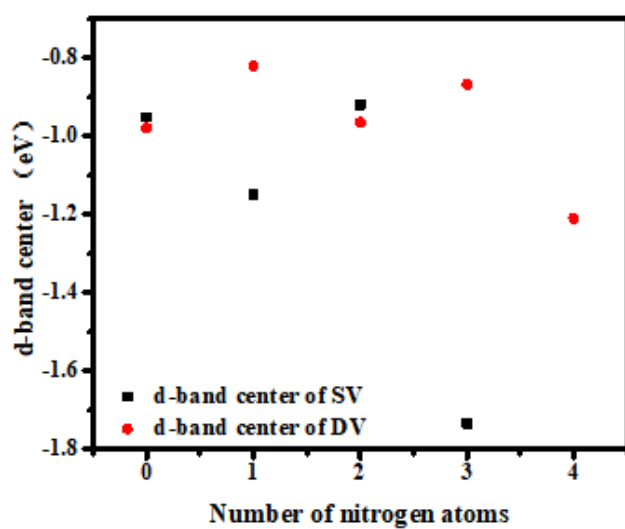

Figure S3. d-band center versus number of N atoms in single-double vacancy.
